# Supplementary material
Source: PubMed Central journal article supplement (PMC5998998)
Supplement: JCB712163_supplementary_material.pdf [file JCB712163_supplementary_material.pdf]

## **Supplementary data**

### **Figure 1: Flowchart**

Two out of 21 randomized treated animals died in the vehicle group, 3 out of 22 in the 0.1 mg/kg/hr and 4 out of 20 in the 1 mg/kg/hr in the (S)-roscovitine treated groups, i.e. 9.5%, 13.6% and 20% respectively. *CBF: Cerebral blood flow*

### **Table 1: Scale used to measure neurological score**

### **Table 2: Baseline characteristics**

Mortality and physiological parameter monitoring during transient MCAo procedure and until day of sacrifice in the Vehicle control group (n = 13) and (S)-roscovitine treatment groups: 0.1 mg/kg (n = 10) and 1 mg/kg (n = 13). Data are expressed as means  $\pm$  SD. Data were analyzed by Student unpaired *t*-test or Fisher exact test (mortality). Signs indicate values different from Vehicle: \*  $p < 0.05$ . *CBF: Cerebral blood flow*
